# Supplementary material
Source: PubMed Central journal article supplement (PMC8803854)

**A**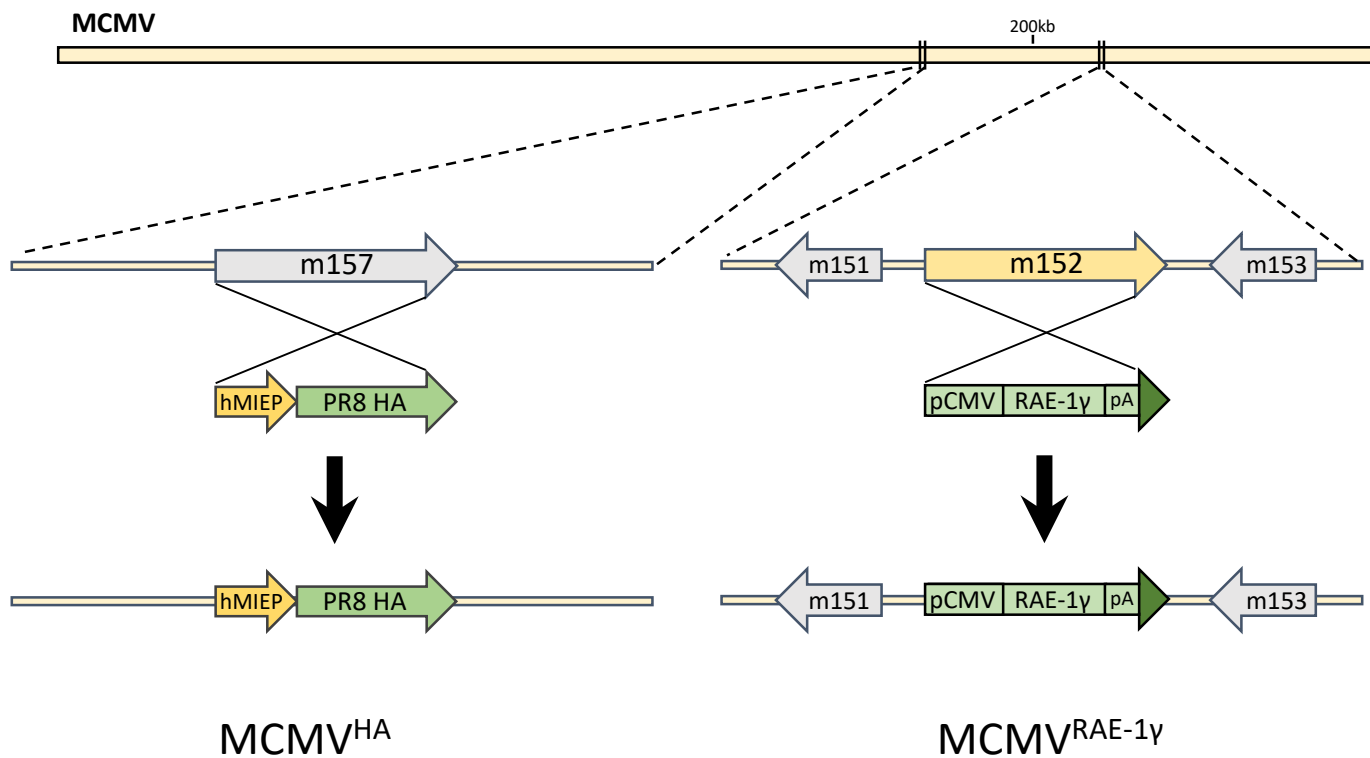**B**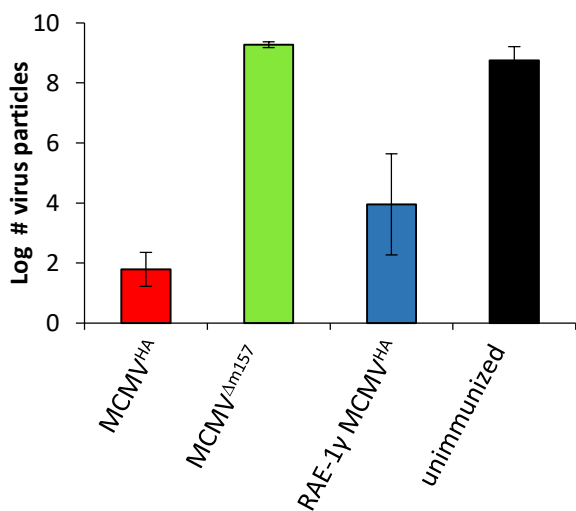**C**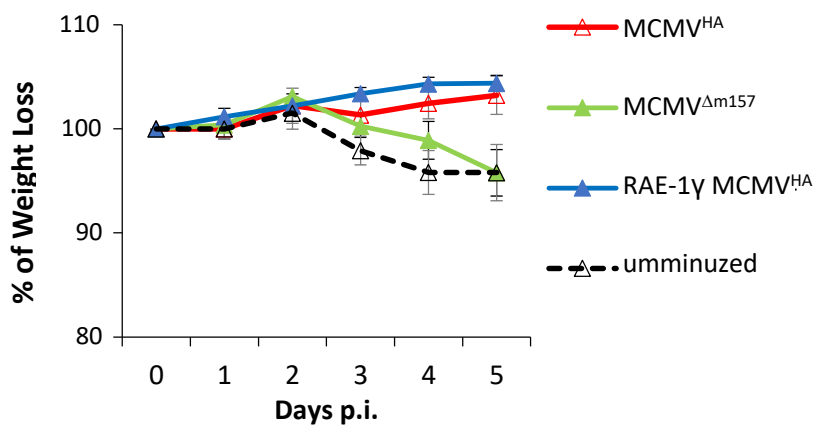

**A**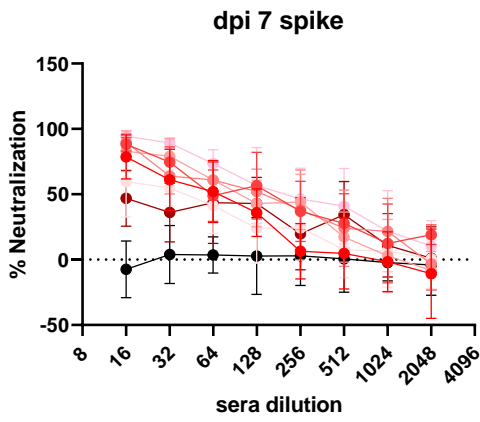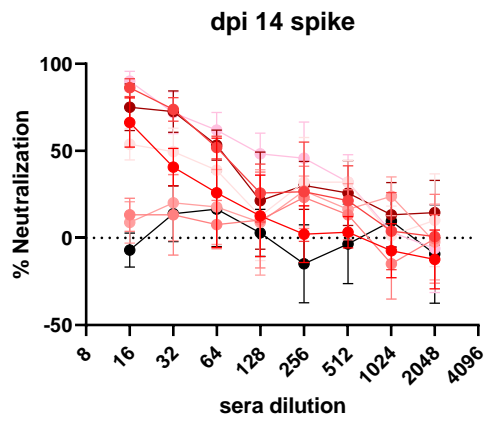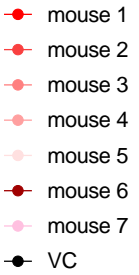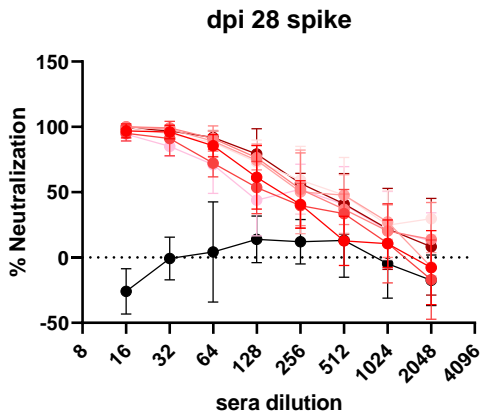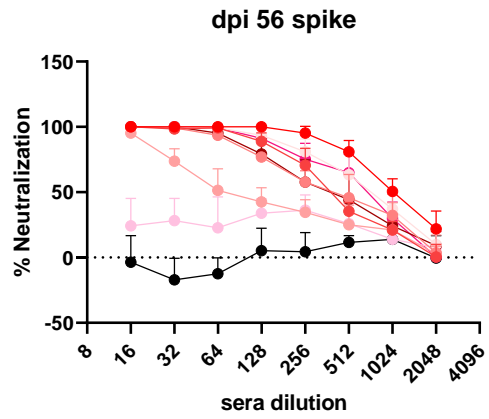**B**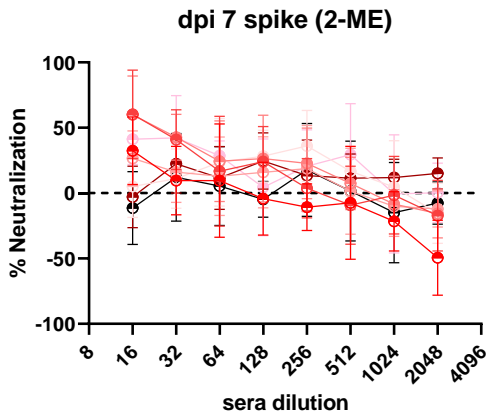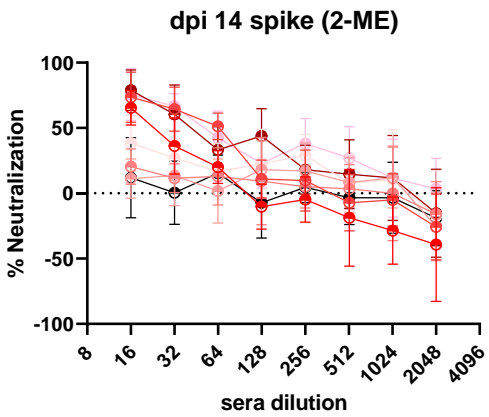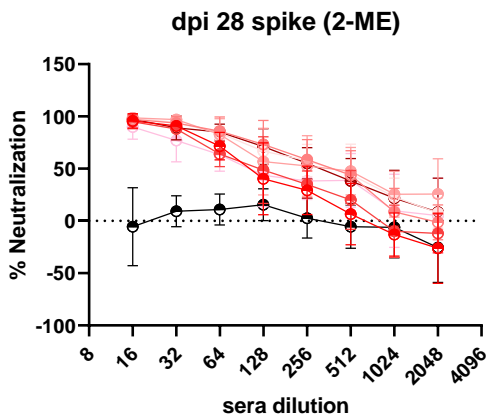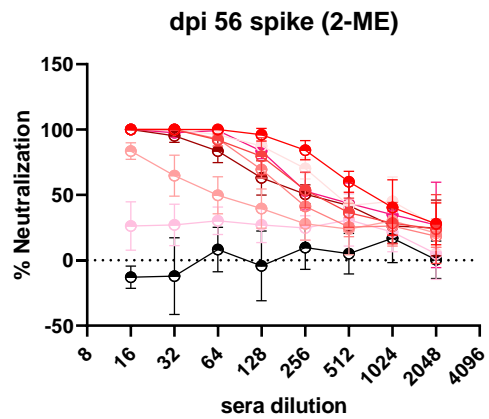

**A**

dpi 7 WT

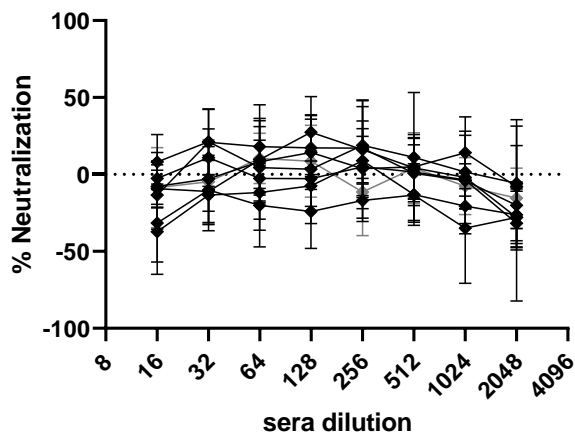

dpi 28 WT

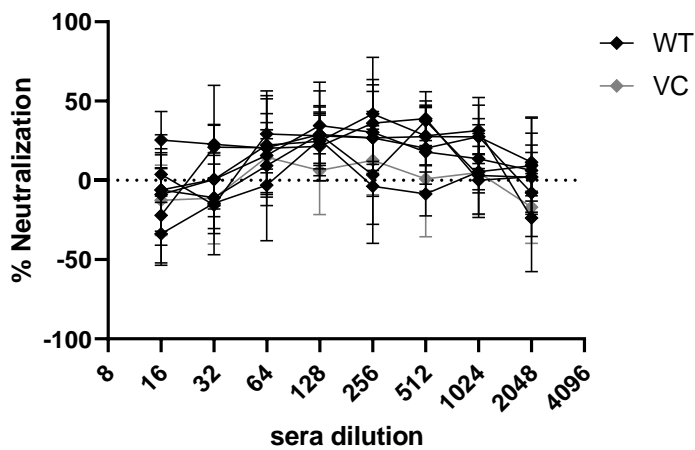

dpi 14 WT

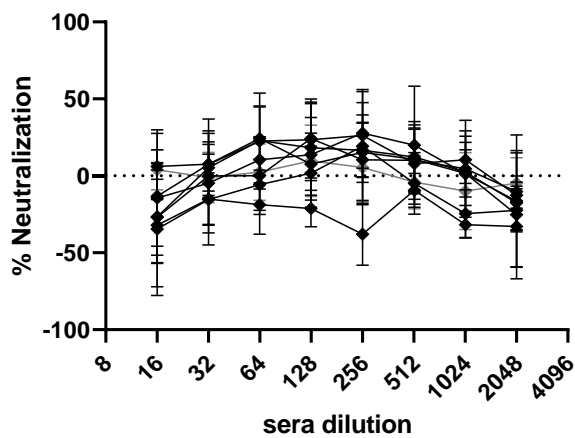

dpi 56 WT

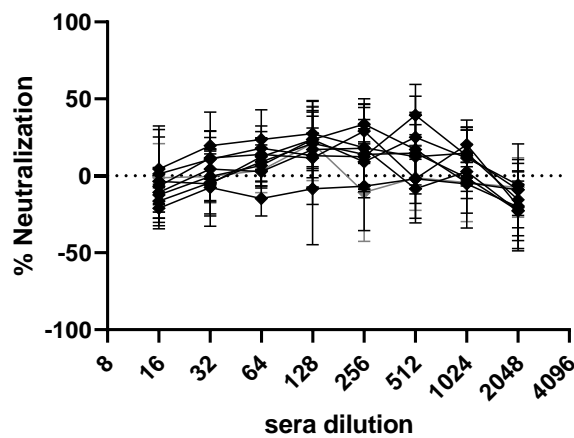**B**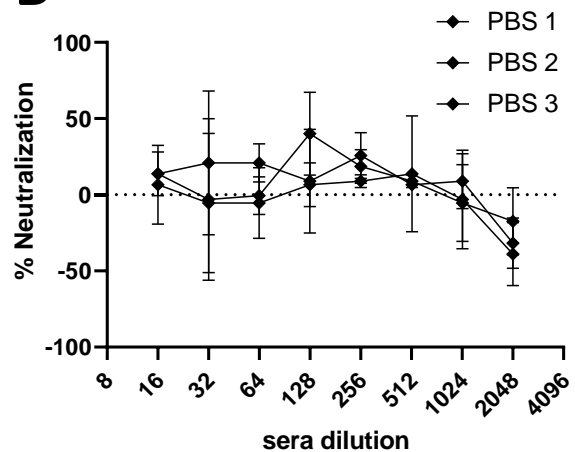**C**

C57BL/6

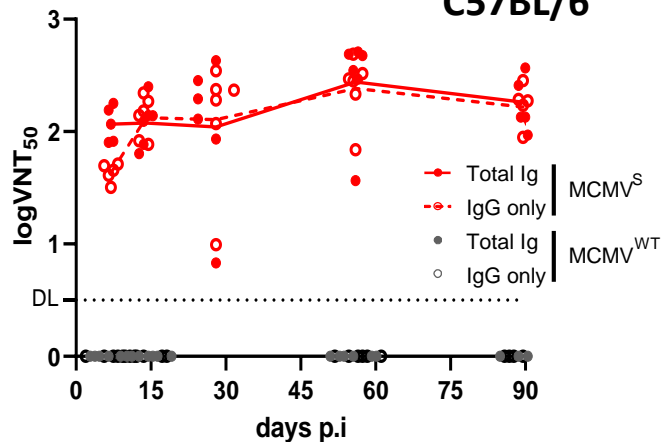

Supplement: 41423_2021_814_MOESM1_ESM.pdf [file 41423_2021_814_MOESM1_ESM.pdf]
